# Supplementary material for: Accounting for long-range correlations in genome-wide simulations of large cohorts
Source: PubMed Central journal article supplement (PMC7266353; doi:10.1371/journal.pgen.1008619), 2020-05-05
Supplement: pgen.1008619.s002.pdf [file pgen.1008619.s002.pdf]

## S2 Appendix. Long-range linkage disequilibrium

For pairs of loci at low recombination distances ( $r \ll 1$ ), it is unlikely for more than a single recombination event to occur in a given meiosis. In this case, the coalescent accurately models LD between linked loci. For larger recombination distances, loci only become unlinked under an odd number of recombinations. This has probability  $P(\text{odd \# rec. events} | r) = \frac{1 - e^{-2r}}{2}$ , which has a maximum value of  $1/2$ . This leads to non-zero long-range LD, even in the case of fully unlinked loci [1]. The diploid Wright-Fisher captures this, but coalescent estimates of LD decay to zero for increasing  $r$  (Fig A).

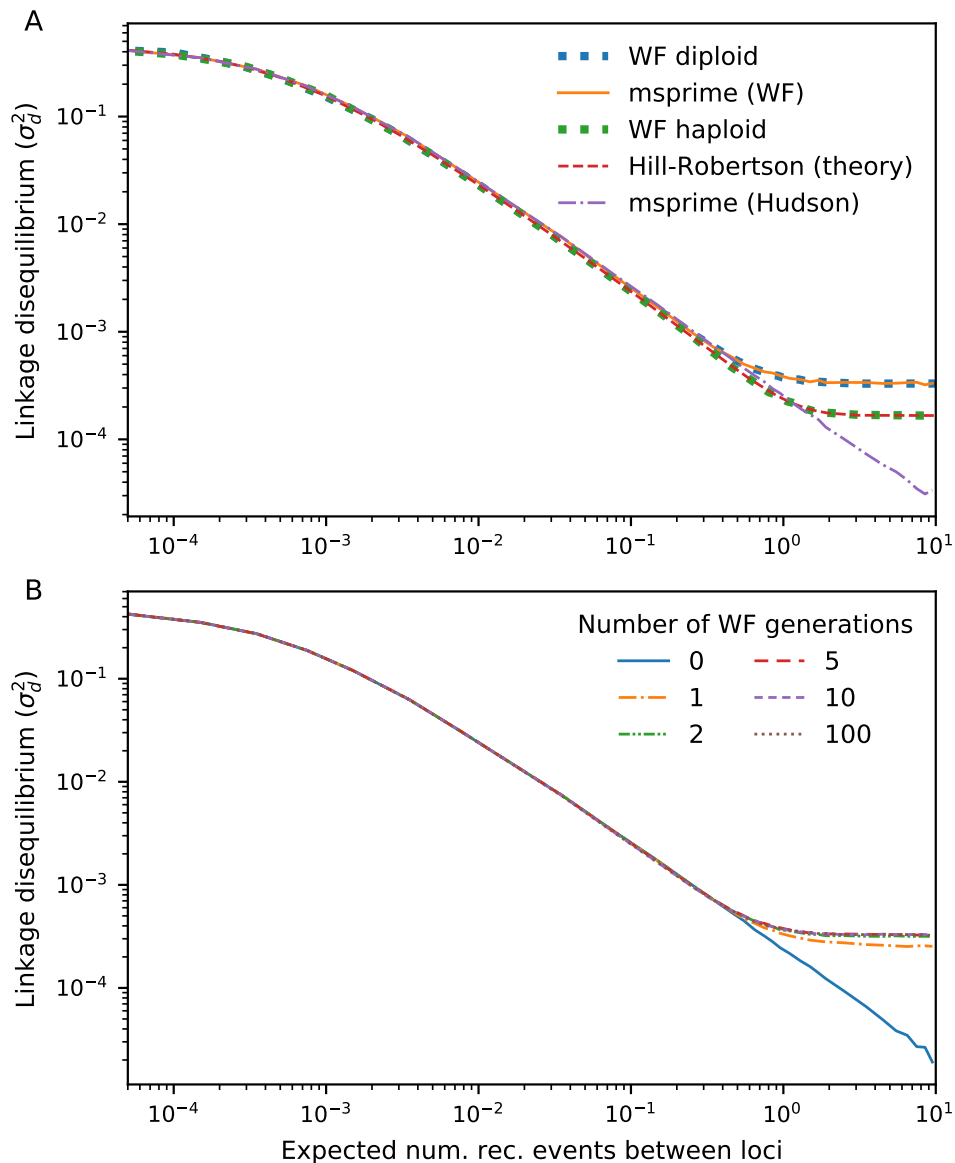

**Fig A. Linkage disequilibrium as measured by  $\sigma_D^2 = E[D^2]/E[p(1-p)q(1-q)]$  under different simulation and theory models [2].** Simulations were carried out with population size  $N = 1000$  at steady state demography for a single 10M chromosome. At fully unlinked loci, the expected value of  $\sigma_D^2$  is  $\frac{1}{3N}$  in a diploid model and  $\frac{1}{6N}$  in a haploid model [3]. (A) Hudson and Wright-Fisher simulations. (B) Hybrid simulations with varying numbers of Wright-Fisher generations before switching to the Hudson coalescent.

## References

- [1] L. King, J. Wakeley, and S. Carmi. “A non-zero variance of Tajima’s estimator for two sequences even for infinitely many unlinked loci”. In: *Theoretical Population Biology* 122 (2018), pp. 22–29.
- [2] W. G. Hill and A. Robertson. “Linkage disequilibrium in finite populations”. In: *Theoretical and Applied Genetics* 38.6 (1968), pp. 226–231.
- [3] A. P. Ragsdale and S. Gravel. “Unbiased Estimation of Linkage Disequilibrium from Unphased Data”. In: *Molecular Biology and Evolution* (Nov. 2019).
