# Supplementary material for: Accounting for long-range correlations in genome-wide simulations of large cohorts
Source: PubMed Central journal article supplement (PMC7266353; doi:10.1371/journal.pgen.1008619), 2020-05-05
Supplement: pgen.1008619.s003.pdf [file pgen.1008619.s003.pdf]

## S3 Appendix. An approximate model for IBD

### sharing

To provide a simple analytical model for the relationship between total length and counts of IBD sharing, we simply consider a pair of haploid samples sharing a single diploid common ancestor at time  $t$  generations in the past and estimate the expected number and length of haplotypes shared given  $t$  (similar derivations have been made in [1–4]). We can think of the ancestry of each haploid genome as a mosaic formed by copying genomic segments from its  $2^{t-1}$  possible ancestors. Similarly, a pair of haploid samples can be seen as a mosaic formed by copying from one ancestor for each sample. We can define paired-ancestry segments as continuous segments having no changes in ancestry in either sample. By this definition, if each sample has  $K$  chromosomes of total length  $L$  Morgans, the pair will have on average  $K + 2Lt$  paired-ancestry segments.

Since each haploid sample has  $2^{t-1}$  possible ancestors from which to inherit genetic material, a pair of samples will both inherit a paired-ancestry segment from their common ancestor with probability  $\frac{1}{2^{2t-2}}$ . Since the ancestor is diploid, they inherit from the same ancestral copy of the genome with probability  $\frac{1}{2}$ . The probability that a paired-ancestry segment is IBD in the pair is therefore  $\frac{1}{2^{2t-1}}$ , and the expected number of IBD segments  $s$  between the pair is:

$$s = \frac{K + 2Lt}{2^{2t-1}}. \quad (1)$$

The length of the genome shared, denoted by  $x$ , corresponds to  $L$  times the probability of having a shared ancestor at any particular locus, which is  $\frac{1}{2^{2t-1}}$ , giving:

$$x = \frac{L}{2^{2t-1}}. \quad (2)$$

The expected values  $(s, x)$  are shown in Fig 3 in main text as white dots for  $t$  from 1 to 5 generations, corresponding to half-siblings, first half-cousins, and so on.

Under monogamy, a similar argument can be used to obtain

$$s = \frac{K + 2Lt}{2^{2t-2}}. \quad (3)$$

and

$$x = \frac{L}{2^{2t-2}}. \quad (4)$$

Similarly, avuncular relationships in monogamy have three meioses (so  $K + 3L$  segments) with a sharing probability of  $\frac{1}{2}$  with one of the two shared ancestors.

$$s = \frac{K + 3L}{2} \text{ and } x = \frac{L}{2}, \quad (5)$$

and grandparent-offspring have two meioses ( $K + 2L$  segments) with a sharing probability of  $\frac{1}{2}$  between the two haplotypes of the grandparent.

$$s = \frac{K + 2L}{2} \text{ and } x = \frac{L}{2}. \quad (6)$$

However, we expect that meioses occurring in the grandparent could be hidden by the statistical phasing, so that this result would be particularly sensitive to inaccurately phased data.

## References

- [1] A. Thomas, M. H. Skolnick, and C. M. Lewis. “Genomic mismatch scanning in pedigrees”. In: *Mathematical Medicine and Biology* 11.1 (1994), pp. 1–16.
- [2] C. D. Huff, D. J. Witherspoon, T. S. Simonson, J. Xing, W. S. Watkins, Y. Zhang, T. M. Tuohy, D. W. Neklason, R. W. Burt, S. L. Guthery, et al. “Maximum-likelihood estimation of recent shared ancestry (ERSA)”. In: *Genome Research* 21.5 (2011), pp. 768–774.
- [3] Y. Erlich, T. Shor, I. Pe’er, and S. Carmi. “Identity inference of genomic data using long-range familial searches”. In: *Science (New York, N.Y.)* 362.6415 (2018), pp. 690–694.

- [4] K. P. Donnelly. “The probability that related individuals share some section of genome identical by descent”. In: *Theoretical Population Biology* 23.1 (1983), pp. 34–63.
