# Supplementary material for: Accounting for long-range correlations in genome-wide simulations of large cohorts
Source: PubMed Central journal article supplement (PMC7266353; doi:10.1371/journal.pgen.1008619), 2020-05-05
Supplement: pgen.1008619.s006.pdf [file pgen.1008619.s006.pdf]

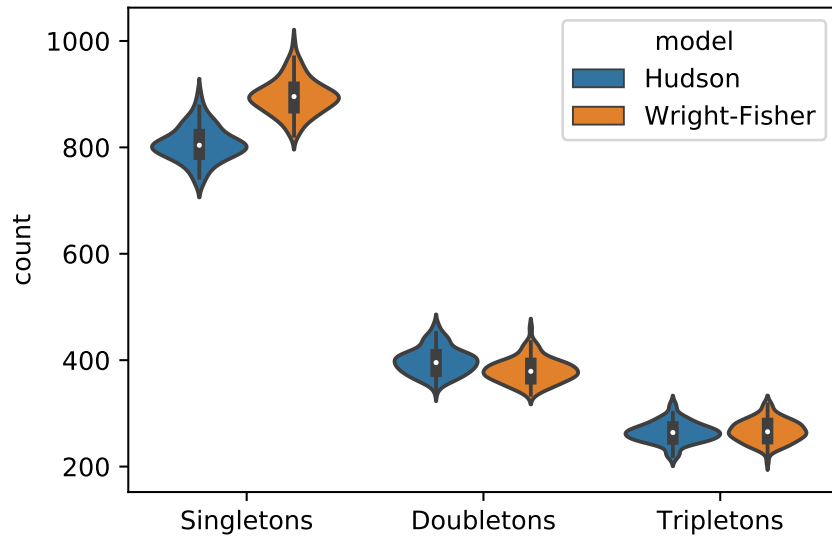

**S1 Figure. Number of singletons, doubletons, and tripletons simulated under Wright-Fisher and Hudson coalescent models.** A 1Mb region was simulated 100 times in 20,000 haploid lineages in a diploid population of 10,000 individuals.
