# Supplementary material for: Accounting for long-range correlations in genome-wide simulations of large cohorts
Source: PubMed Central journal article supplement (PMC7266353; doi:10.1371/journal.pgen.1008619), 2020-05-05
Supplement: pgen.1008619.s007.pdf [file pgen.1008619.s007.pdf]

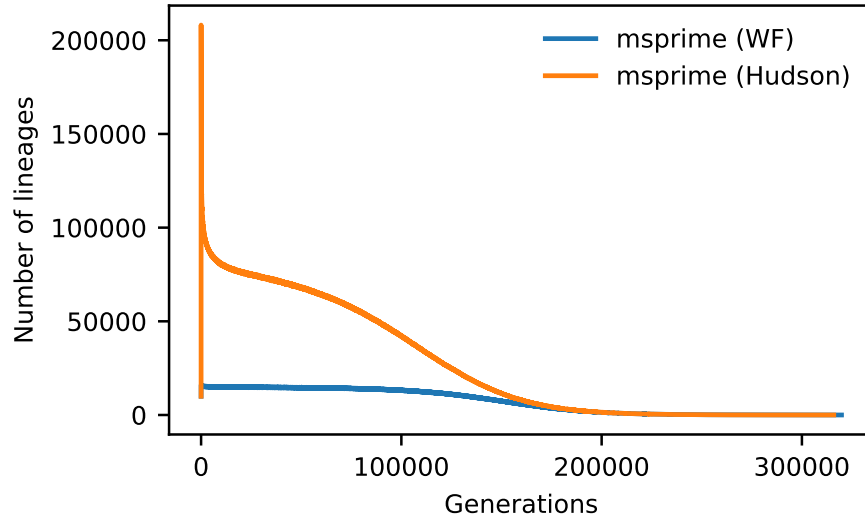

**S2 Figure. Number of surviving lineages over time in coalescent and back-in-time Wright-Fisher dynamics.** We simulated 10,000 haploid whole genomes with 22 chromosomes of realistic lengths in a population of 10,000 diploid individuals. The method for simulating multiple chromosomes is described in S1 Appendix. Similar results were shown in [1].

## References

- [1] J. L. Davies, F. Simančík, R. Lyngsø, T. Mailund, and J. Hein. “On recombination-induced multiple and simultaneous coalescent events”. In: *Genetics* 177.4 (2007), pp. 2151–2160.
