# Supplementary material for: Accounting for long-range correlations in genome-wide simulations of large cohorts
Source: PubMed Central journal article supplement (PMC7266353; doi:10.1371/journal.pgen.1008619), 2020-05-05
Supplement: pgen.1008619.s009.pdf [file pgen.1008619.s009.pdf]

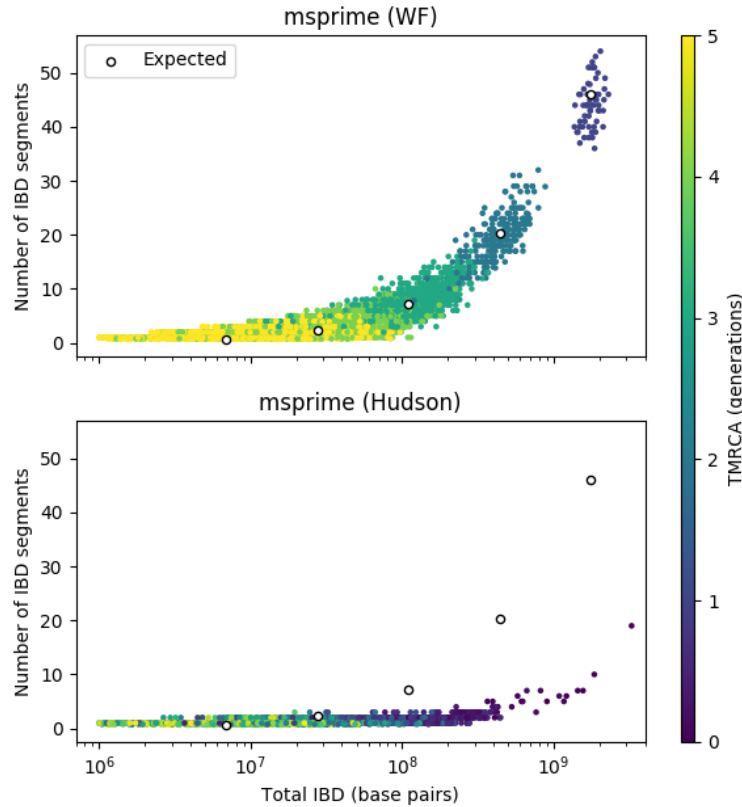

**S4 Figure. Number of IBD segments between pairs of individuals versus total length of shared IBD segments, under the Gutenkunst et. al. (2009) [1] out-of-Africa model.** 22 chromosomes of realistic lengths, simulated under Wright-Fisher model (top) and coalescent (bottom), compared to the analytical expectation under Eqs (1) and (2) of S3 Appendix. The African, European, and Asian populations had 1000 haploid samples each.

## References

- [1] R. N. Gutenkunst, R. D. Hernandez, S. H. Williamson, and C. D. Bustamante. “Inferring the joint demographic history of multiple populations from multidimensional SNP frequency data”. In: *PLoS Genetics* 5.10 (2009).
